# Supplementary material for: PD-L1 Expression Is Significantly Associated with Tumor Mutation Burden and Microsatellite Instability Score
Source: MDPI journal article supplement (doi:10.3390/cancers13184659), 2021-09-16
Supplement: s1 [file s1]

Supplementary

# PD-L1 Expression Is Significantly Associated with Tumor Mutation Burden and Microsatellite Instability Score

Yoon Ah Cho, Hyunwoo Lee, Deok Geun Kim, Hyunjin Kim, Sang Yun Ha, Yoon-La Choi, Kee-Taek Jang and Kyoung-Mee Kim

**Table S1.** Calculation of Tumor mutational burden (TMB). TMB = (Total eligible variants (N))/(Total coding region  $\geq 50\times$  coverage (N))

| Trusight Oncology 500 and Whole-exome Sequencing |                                          |
|--------------------------------------------------|------------------------------------------|
| Eligible Variants                                | Non-eligible Variants                    |
| SNVs and indels                                  | In non-coding regions                    |
| In coding regions                                | In low-confidence regions                |
| In high-confidence regions*                      | With high COSMIC counts ( $\geq 50$ )    |
| With $\geq 50\times$ coverage                    | Multinucleotide variants                 |
| With $\geq 5\%$ VAF                              | Filtered germline variants               |
|                                                  | Found in germline variant databases†     |
|                                                  | Additional variants flagged based on VAF |

Abbreviations: single nucleotide variant, SNV; insertion and deletion, indel; variant allele frequency, VAF; \* High-confidence regions defined as more than 50x coverage. † Germline variant databases include gnomAD, ExAC, and dbSNP.

**Table S2.** Overall sequencing quality of 310 cases.

|                                | Average $\pm$ 2SD             | Recommended Guideline Quality Threshold |
|--------------------------------|-------------------------------|-----------------------------------------|
| Median insert size             | 110.11 $\pm$ 8.61             | $\geq 70$                               |
| Median exon coverage           | 592.81 $\pm$ 286.56           | $\geq 150$                              |
| Percentage of exon 50x (%)     | 98.74 $\pm$ 3.71              | $\geq 90.0$                             |
| Usable MSI sites               | 98.14 $\pm$ 25.03             | $\geq 40$                               |
| Total passing filter reads     | 88714647.10 $\pm$ 12462333.05 | $\geq 80,000,000$                       |
| Mean family size (duplication) | 2.621613 $\pm$ 1.716591       | N/A                                     |
| Percentage of target 0.4x mean | 83.54 $\pm$ 8.91              | N/A                                     |

Abbreviations: MSI, Microsatellite instability; N/A, not available.

**Table S3.** Tumor mutation values of TSO500 and Whole exome sequencing.

| Case No. | Coding Region Size of TSO 500 (MBp) | Number of Eligible Variants of TSO 500 | TMB of TSO 500 | Interpretation of TSO 500 | Coding Region Size of WES (MBp) | Number of Eligible Variants of TSO 500 | TMB of WES | Interpretation of WES |
|----------|-------------------------------------|----------------------------------------|----------------|---------------------------|---------------------------------|----------------------------------------|------------|-----------------------|
| Case 1   | 1.28                                | 110                                    | 85.9           | TMB-High                  | 35.9                            | 1469                                   | 40.9       | TMB-High              |
| Case 2   | 1.28                                | 9                                      | 7              | TMB-Low                   | 35.9                            | 84                                     | 2.3        | TMB-Low               |
| Case 3   | 1.28                                | 12                                     | 9.4            | TMB-Low                   | 35.9                            | 147                                    | 4.1        | TMB-Low               |
| Case 4   | 1.28                                | 122                                    | 95.4           | TMB-High                  | 35.9                            | 2182                                   | 60.8       | TMB-High              |
| Case 5   | 1.28                                | 87                                     | 68             | TMB-High                  | 35.9                            | 1012                                   | 28.2       | TMB-High              |
| Case 6   | 1.28                                | 6                                      | 4.7            | TMB-Low                   | 35.9                            | 74                                     | 2.1        | TMB-Low               |
| Case 7   | 1.28                                | 4                                      | 3.1            | TMB-Low                   | 35.9                            | 68                                     | 1.9        | TMB-Low               |

TMB, Tumor mutation burden; TSO 500, Trusight oncology 500; WES, whole-exome sequencing.

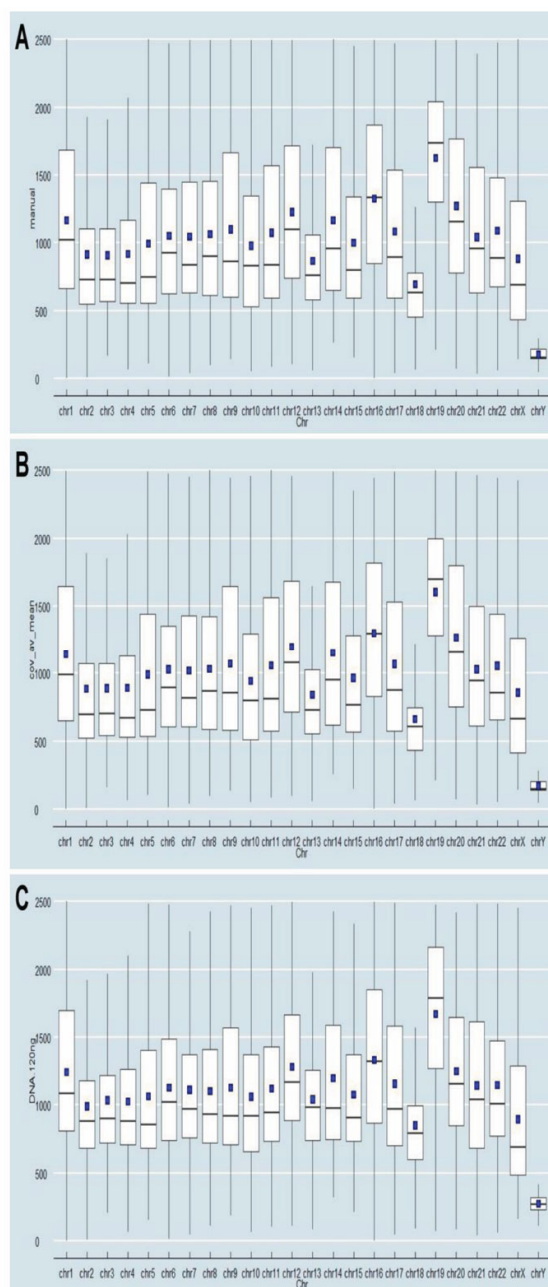

**Figure S1.** The average depth of coverage according to DNA extraction method and input. **(A)** Average depth of coverage using the beads pooling method. **(B)** Average depth according to the manual method **(C)** Increase in the average depth of coverage due to increase in the DNA input from 80 ng to 120 ng.

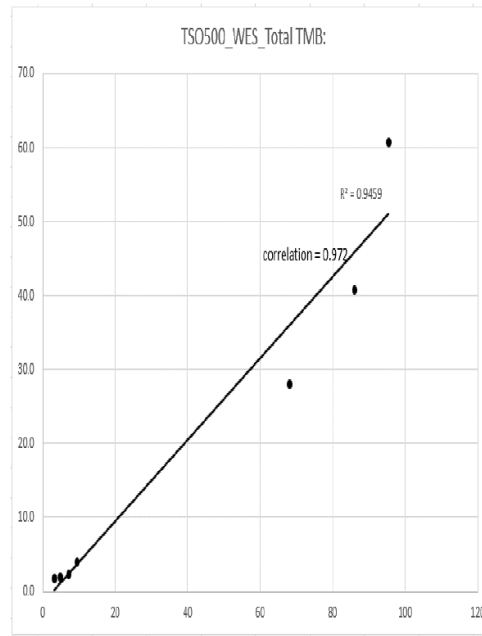

**Figure S2.** Comparison measurement of tumor mutation burden (TMB) between TruSight oncology 500 (TSO 500) and whole-exome sequencing (WES). They showed high concordance between the TMB measurements from the TSO 500 and WES analyses. TMB values from both assays exhibited a high concordance ( $R^2 = 0.972$ ).
